# Supplementary material for: Nickel and either tantalum or niobium-codoped TiO2 and SrTiO3 photocatalysts with visible-light response for H2 or O2 evolution from aqueous solutions
Source: Royal Society of Chemistry journal article supplement (doi:10.1039/b502147b), 2005-01-01
Supplement: b502147b.pdf [file b502147b.pdf]

---

**Nickel and either tantalum or niobium-codoped TiO<sub>2</sub> and SrTiO<sub>3</sub> photocatalysts with visible-light response for H<sub>2</sub> or O<sub>2</sub> evolution from aqueous solutions**

---

**SUPPLEMENTARY INFORMATION**

Ryo Niishiro,<sup>a</sup> Hideki Kato<sup>a</sup> and Akihiko Kudo<sup>\*ab</sup>

<sup>a</sup> Department of Applied Chemistry, Faculty of Science, Science University of Tokyo, 1-3 Kagurazaka, Shinjyuku-ku, Tokyo 162-8601, Japan. Fax: +81-33235-2214; E-mail: a-kudo@rs.kagu.tus.ac.jp

<sup>b</sup> Core Research for Evolutional Science and Technology, Japan Science and Technology Agency (CREST, JST), 4-1-8 Honcho, Kawaguchi-shi, Saitama 332-0012, Japan.

---

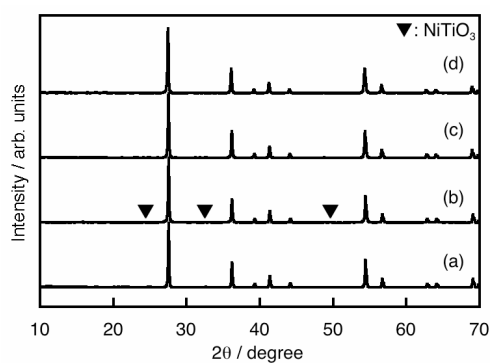

**Fig. A** X-ray diffraction patterns of the TiO<sub>2</sub> series: (a) non-doped; (b) Ni(1.0%)-doped; (c) Ni(1.0%)/Nb(2.0%)-codoped and (d) Ni(1.0%)-Ta(2.0%)-codoped TiO<sub>2</sub>.

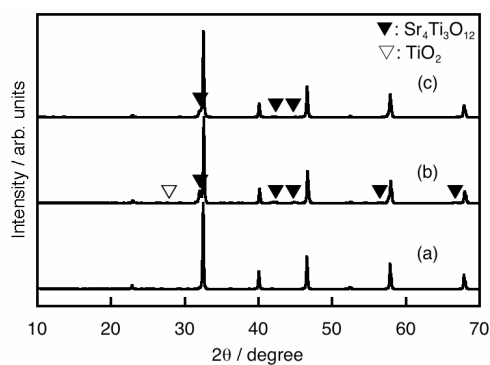

**Fig. B** X-ray diffraction patterns of the SrTiO<sub>3</sub> series: (a) non-doped; (b) Ni(1.0%)-doped and (c) Ni(1.0%)/Ta(2.0%)-codoped SrTiO<sub>3</sub>.

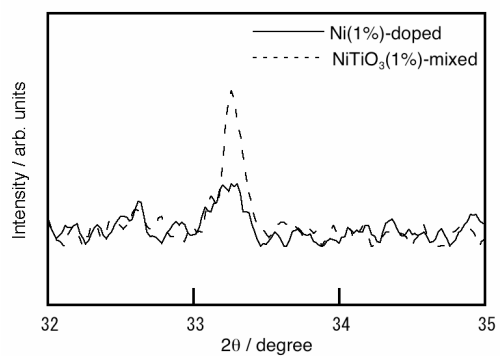

**Fig. C** X-ray diffraction peaks of NiTiO<sub>3</sub> in Ni(1%)-doped TiO<sub>2</sub> (solid line) and NiTiO<sub>3</sub>(1%)-mixed TiO<sub>2</sub> (broken line).

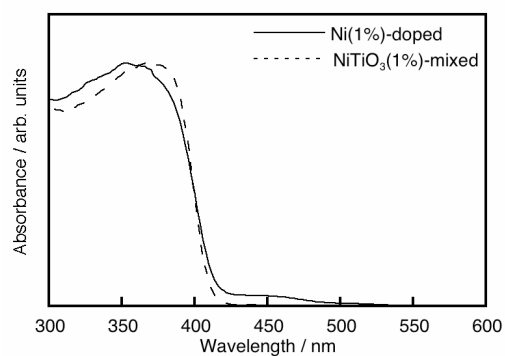

**Fig. D** Diffuse reflection spectra of NiTiO<sub>3</sub> in Ni(1%)-doped TiO<sub>2</sub> (solid line) and NiTiO<sub>3</sub>(1%)-mixed TiO<sub>2</sub> (broken line).
